# Supplementary material for: RNA interference identifies domesticated viral genes involved in assembly and trafficking of virus-derived particles in ichneumonid wasps
Source: PLoS Pathog. 2019 Dec 13;15(12):e1008210. doi: 10.1371/journal.ppat.1008210 (PMC6957214; doi:10.1371/journal.ppat.1008210)
Supplement: S4 Table — Two-tailed unpaired t-test or Welch test statistics. ns = non-significant, *p<0.005, **p<0.01 and ***p<0.001. (XLSX) [file ppat.1008210.s007.xlsx]

## Sheet: Feuil1
S4 Table. IVSPERs genes relative expression comparison between ds-GFP and ds-RNA injected females.
Two-tailed unpaired t-test or Welch test statistics. ns=non-significant. *p<0.005. **p<0.01 and ***p<0.001.
		Levene's Test for equality of variance		t-test Equality of Means or Welch t-test				95% confidence interval of the difference
Condition	Target Gene	F	P value	t	df	P value	Significance	Lower	upper
dsGFP vs dsIVp12-1	IVp53-1	1.0262	0.344	1.9959	7	0.08614	n.s	-0.0145	0.171
dsGFP vs dsIVp12-1	IVp53-2	0.4761	0.5124	-0.8802	7	0.4079	n.s	-0.0994	0.0455
dsGFP vs dsIVp12-1	IVSP3-1	0.0653	0.8056	-2.2528	7	0.05895	n.s	-0.141	0.00343
dsGFP vs dsIVp12-1	IVSP4-1	2.0928	0.1912	-0.305	7	0.7692	n.s	-0.485	0.374
dsGFP vs dsIVp12-1	IVp12-1	3.9556	0.08704	-4.7736	7	0.002027	**	-6.13	-2.0689
dsGFP vs dsIVp12-1	U22	0.2	0.6682	-0.9148	7	0.3907	n.s	-0.0875	0.0387
dsGFP vs dsIVp12-1	U23	0.1993	0.6688	-0.6333	7	0.5466	n.s	-0.932	0.538
dsGFP vs dsU23	IVp53-1	1.5608	0.2517	1.6747	7	0.1379	n.s	-0.0312	0.183
dsGFP vs dsU23	IVp53-2	1.8102	0.2204	2.165	7	0.0671	n.s	-0.0133	0.302
dsGFP vs dsU23	IVSP3-1	1.7808	0.2238	1.8499	7	0.1068	n.s	-0.0008	0.0658
dsGFP vs dsU23	IVSP4-1	3.3786	0.1086	1.2422	7	0.2542	n.s	-0.205	0.66
dsGFP vs dsU23	IVp12-1	1.5301	0.256	2.4104	7	0.04675	*	0.0114	1.193
dsGFP vs dsU23	U22	0.5842	0.4696	0.7738	7	0.4644	n.s	0.0333	0.0657
dsGFP vs dsU23	U23	2.829	0.1365	16.161	7	< 0.001	***	2.839	3.812
dsGFP vs dsIVSP4-1	IVp53-1	1.5005	0.25	-1.3447	9	0.2116	n.s	-0.136	0.034
dsGFP vs dsIVSP4-1	IVp53-2	0.0003	0.98	-1.0422	9	0.3245	n.s	-0.269	0.099
dsGFP vs dsIVSP4-1	IVSP3-1	0.6713	0.43	0.60851	9	0.5579	n.s	-0.121	0.211
dsGFP vs dsIVSP4-1	IVSP4-1	9.664	0.01255	-7.643	4.007	0.001563	**	-1.628	-0.761
dsGFP vs dsIVSP4-1	IVp12-1	0.9502	0.3551	-1.5345	9	0.1593	n.s	-0.855	0.163
dsGFP vs dsIVSP4-1	U22	2.1312	0.1783	-0.7235	9	0.4877	n.s	-0.0487	0.0251
dsGFP vs dsIVSP4-1	U23	0.1464	0.7109	-1.9141	9	0.0878	n.s	-1.147	0.0956
dsGFP vs dsU22	IVp53-1	0.7995	0.3974	-1.3054	8	0.228	n.s	-0.156	0.0434
dsGFP vs dsU22	IVp53-2	2.282	0.1693	-0.1537	8	0.8816	n.s	-0.147	0.129
dsGFP vs dsU22	IVSP3-1	0.068	0.7997	-0.27429	8	0.7903	n.s	-0.0442	0.0348
dsGFP vs dsU22	IVSP4-1	0.7421	0.4141	0.85315	8	0.4184	n.s	-0.272	0.592
dsGFP vs dsU22	IVp12-1	0.6404	0.4467	1.8168	8	0.1068	n.s	-0.192	1.626
dsGFP vs dsU22	U22	3.818	0.08646	-6.7438	8	< 0.001	***	-0.153	-0.0752
dsGFP vs dsU22	U23	0.0458	0.8358	1.1396	8	0.2874	n.s	-0.317	0.938
dsGFP vs dsIVSP3-1	IVp53-1	0.5755	0.4675	-0.46424	9	0.6535	n.s	-0.101	0.0668
dsGFP vs dsIVSP3-1	IVp53-2	0.0541	0.8213	-1.1944	9	0.2628	n.s	-0.115	0.0356
dsGFP vs dsIVSP3-1	IVSP3-1	3.367	0.09971	-10.868	9	< 0.001	***	-0.261	-0.171
dsGFP vs dsIVSP3-1	IVSP4-1	0.0254	0.8768	-1.0705	9	0.1323	n.s	-0.853	0.305
dsGFP vs dsIVSP3-1	IVp12-1	0.0122	0.9145	-0.4227	9	0.6824	n.s	-2.748	1.882
dsGFP vs dsIVSP3-1	U22	0.0201	0.8903	-1.2557	9	0.2408	n.s	-0.0855	0.0244
dsGFP vs dsIVSP3-1	U23	0.2072	0.6597	-0.21933	9	0.8313	n.s	-0.855	0.703
dsGFP vs dsIVp53-2	IVp53-1	0.6448	0.4452	1.0871	8	0.3087	n.s	-0.277	0.773
dsGFP vs dsIVp53-2	IVp53-2	5.1033	0.0538	-4.9251	8	0.001157	**	-0.376	-0.136
dsGFP vs dsIVp53-2	IVSP3-1	3.1929	0.1118	-1.1756	8	0.2735	n.s	-0.16	0.052
dsGFP vs dsIVp53-2	IVSP4-1	0.8492	0.3837	-0.235	8	0.82	n.s	-0.7333	0.597
dsGFP vs dsIVp53-2	IVp12-1	0.0275	0.8724	-0.093	8	0.9282	n.s	-1.221	1.126
dsGFP vs dsIVp53-2	U22	0.8054	0.3957	-1.1835	8	0.2706	n.s	-0.0852	0.0274
dsGFP vs dsIVp53-2	U23	0.5755	0.4675	-0.853	8	0.4184	n.s	-0.843	0.387
